# Supplementary material for: Comparative assessment of the chromatographic separation of 2,3,7,8-substituted polychlorinated dibenzo-p-dioxins and polychlorinated dibenzofurans using supercritical fluid chromatography and high resolution gas chromatography
Source: Royal Society of Chemistry journal article supplement (doi:10.1039/c5ay01644d), 2015-01-01
Supplement: c5ay01644d1.pdf [file c5ay01644d1.pdf]

ELECTRONIC SUPPLEMENTARY INFORMATION

Comparative Assessment of the Chromatographic Separation of 2,3,7,8-Substituted Polychlorinated  
Dibenzo-*p*-Dioxins and Polychlorinated Dibenzofurans Using Supercritical Fluid Chromatography and  
High Resolution Gas Chromatography

Nicole Riddell<sup>a,b,\*</sup>, Bert van Bavel<sup>b</sup>, Ingrid Ericson Jogsten<sup>b</sup>, Robert McCrindle<sup>c</sup>, Alan McAlees<sup>a</sup>, Dave  
Potter<sup>a</sup>, Colleen Tashiro<sup>a</sup>, Brock Chittim<sup>a</sup>

<sup>a</sup>. Wellington Laboratories Inc., 345 Southgate Drive, Guelph, Ontario, Canada, N1G 3M5

<sup>b</sup>. Man-Technology-Environment (MTM) Research Center, Örebro University, Örebro 70182 Sweden

<sup>c</sup>. Chemistry Department, University of Guelph, Guelph, Ontario, Canada N1G 2W1

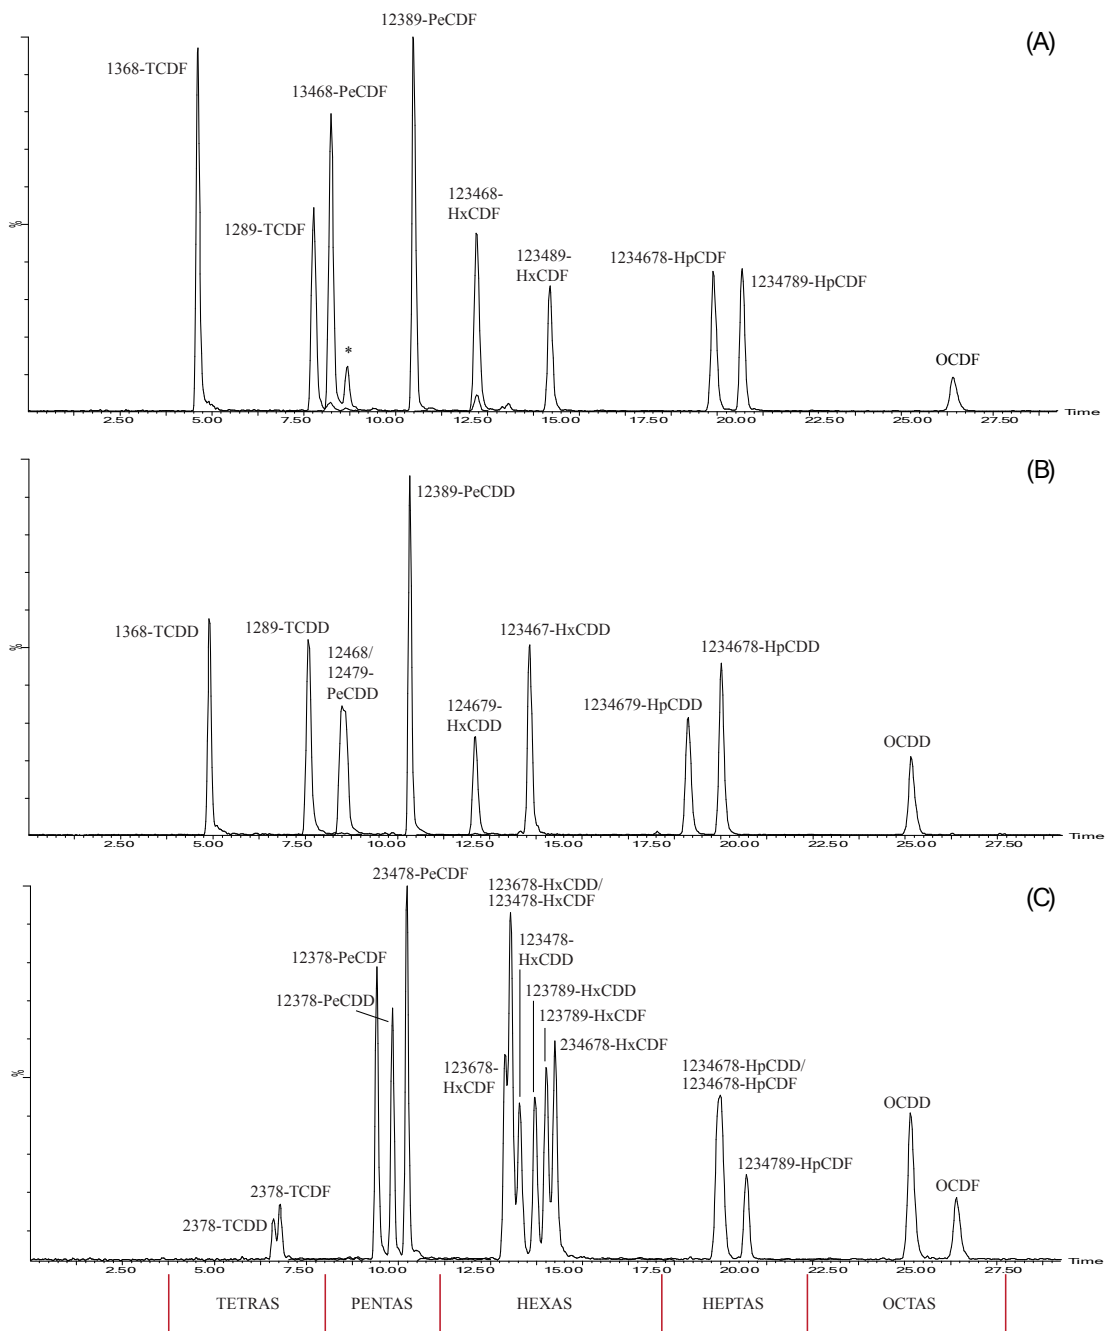

Figure S1: Chromatograms illustrating the separation of the (A) PCDF HRGC window definers (\* indicates a PCDF impurity in the mixture), (B) PCDD HRGC window definers, and (C) a mixture of 2,3,7,8-substituted PCDD and PCDF congeners using the developed pSFC-MS/MS method.

Table S1: Components and Concentrations of EPA-1613STOCK

| <b>Component</b>                          | <b>Concentration (ng/ml)</b> |
|-------------------------------------------|------------------------------|
| 2,3,7,8-Tetrachlorodibenzo-p-dioxin       | 400                          |
| 1,2,3,7,8-Pentachlorodibenzo-p-dioxin     | 2000                         |
| 1,2,3,4,7,8-Hexachlorodibenzo-p-dioxin    | 2000                         |
| 1,2,3,6,7,8-Hexachlorodibenzo-p-dioxin    | 2000                         |
| 1,2,3,7,8,9-Hexachlorodibenzo-p-dioxin    | 2000                         |
| 1,2,3,4,6,7,8-Heptachlorodibenzo-p-dioxin | 2000                         |
| Octachlorodibenzo-p-dioxin                | 4000                         |
|                                           |                              |
| 2,3,7,8-Tetrachlorodibenzofuran           | 400                          |
| 1,2,3,7,8-Pentachlorodibenzofuran         | 2000                         |
| 2,3,4,7,8-Pentachlorodibenzofuran         | 2000                         |
| 1,2,3,4,7,8-Hexachlorodibenzofuran        | 2000                         |
| 1,2,3,6,7,8-Hexachlorodibenzofuran        | 2000                         |
| 1,2,3,7,8,9-Hexachlorodibenzofuran        | 2000                         |
| 2,3,4,6,7,8-Hexachlorodibenzofuran        | 2000                         |
| 1,2,3,4,6,7,8-Heptachlorodibenzofuran     | 2000                         |
| 1,2,3,4,7,8,9-Heptachlorodibenzofuran     | 2000                         |
| Octachlorodibenzofuran                    | 4000                         |

Table S2: Components and Concentrations of EPA-8280CVS

| Component                                                               | Concentration (ng/μl) |       |      |     |      |
|-------------------------------------------------------------------------|-----------------------|-------|------|-----|------|
|                                                                         | CS1                   | CS2   | CS3  | CS4 | CS5  |
| 2,3,7,8-Tetrachlorodibenzofuran                                         | 0.1                   | 0.25  | 0.5  | 1.0 | 2.0  |
| 1,2,3,7,8-Pentachlorodibenzofuran                                       | 0.1                   | 0.25  | 0.5  | 1.0 | 2.0  |
| 2,3,4,7,8-Pentachlorodibenzofuran                                       | -                     | -     | 0.5  | -   | -    |
| 1,2,3,4,7,8-Hexachlorodibenzofuran                                      | -                     | -     | 1.25 | -   | -    |
| 1,2,3,6,7,8-Hexachlorodibenzofuran                                      | 0.25                  | 0.625 | 1.25 | 2.5 | 5.0  |
| 2,3,4,6,7,8-Hexachlorodibenzofuran                                      | -                     | -     | 1.25 | -   | -    |
| 1,2,3,7,8,9-Hexachlorodibenzofuran                                      | -                     | -     | 1.25 | -   | -    |
| 1,2,3,4,6,7,8-Heptachlorodibenzofuran                                   | 0.25                  | 0.625 | 1.25 | 2.5 | 5.0  |
| 1,2,3,4,7,8,9-Heptachlorodibenzofuran                                   | -                     | -     | 1.25 | -   | -    |
| Octachlorodibenzofuran                                                  | 0.5                   | 1.25  | 2.5  | 5.0 | 10.0 |
| 2,3,7,8-Tetrachlorodibenzo-p-dioxin                                     | 0.1                   | 0.25  | 0.5  | 1.0 | 2.0  |
| 1,2,3,7,8-Pentachlorodibenzo-p-dioxin                                   | 0.1                   | 0.25  | 0.5  | 1.0 | 2.0  |
| 1,2,3,4,7,8-Hexachlorodibenzo-p-dioxin                                  | -                     | -     | 1.25 | -   | -    |
| 1,2,3,6,7,8-Hexachlorodibenzo-p-dioxin                                  | 0.25                  | 0.625 | 1.25 | 2.5 | 5.0  |
| 1,2,3,7,8,9-Hexachlorodibenzo-p-dioxin                                  | -                     | -     | 1.25 | -   | -    |
| 1,2,3,4,6,7,8-Heptachlorodibenzo-p-dioxin                               | 0.25                  | 0.625 | 1.25 | 2.5 | 5.0  |
| Octachlorodibenzo-p-dioxin                                              | 0.5                   | 1.25  | 2.5  | 5.0 | 10.0 |
| 2,3,7,8-Tetrachloro[ <sup>13</sup> C <sub>12</sub> ]dibenzofuran        | 0.5                   | 0.5   | 0.5  | 0.5 | 0.5  |
| 1,2,3,4,6,7,8-Heptachloro[ <sup>13</sup> C <sub>12</sub> ]dibenzofuran  | 1.0                   | 1.0   | 1.0  | 1.0 | 1.0  |
| 2,3,7,8-Tetrachloro[ <sup>13</sup> C <sub>12</sub> ]dibenzo-p-dioxin    | 0.5                   | 0.5   | 0.5  | 0.5 | 0.5  |
| 1,2,3,6,7,8-Hexachloro[ <sup>13</sup> C <sub>12</sub> ]dibenzo-p-dioxin | 0.5                   | 0.5   | 0.5  | 0.5 | 0.5  |
| Octachloro[ <sup>13</sup> C <sub>12</sub> ]dibenzo-p-dioxin             | 1.0                   | 1.0   | 1.0  | 1.0 | 1.0  |
| 1,2,3,4-Tetrachloro[ <sup>13</sup> C <sub>12</sub> ]dibenzo-p-dioxin    | 0.5                   | 0.5   | 0.5  | 0.5 | 0.5  |
| 1,2,3,7,8,9-Hexachloro[ <sup>13</sup> C <sub>12</sub> ]dibenzo-p-dioxin | 0.5                   | 0.5   | 0.5  | 0.5 | 0.5  |

Table S3: Components and Concentrations of 5TCDD

| PCDD Congener                               | Concentration (μg/ml) |
|---------------------------------------------|-----------------------|
| 1,2,3,4-TCDD                                | 0.5                   |
| 1,2,3,7- and 1,2,3,8-TCDD                   | 0.5 (total)           |
| 2,3,7,8-TCDD                                | 1.0                   |
| 1,2,3,9-TCDD                                | 1.0                   |
| <sup>13</sup> C <sub>12</sub> -1,2,3,4-TCDD | 0.5                   |
| <sup>13</sup> C <sub>12</sub> -2,3,7,8-TCDD | 0.5                   |

Table S4: Components and Concentrations of WP-STK

| IUPAC # | PCB Congener                         | Concentration (ng/ml) |
|---------|--------------------------------------|-----------------------|
| 77      | 3,3',4,4'-Tetrachlorobiphenyl        | 2000                  |
| 81      | 3,4,4',5-Tetrachlorobiphenyl         | 2000                  |
| 105     | 2,3,3',4,4'-Pentachlorobiphenyl      | 2000                  |
| 114     | 2,3,4,4',5-Pentachlorobiphenyl       | 2000                  |
| 118     | 2,3',4,4',5-Pentachlorobiphenyl      | 2000                  |
| 123     | 2',3,4,4',5-Pentachlorobiphenyl      | 2000                  |
| 126     | 3,3',4,4',5-Pentachlorobiphenyl      | 2000                  |
| 156     | 2,3,3',4,4',5-Hexachlorobiphenyl     | 2000                  |
| 157     | 2,3,3',4,4',5'-Hexachlorobiphenyl    | 2000                  |
| 167     | 2,3',4,4',5,5'-Hexachlorobiphenyl    | 2000                  |
| 169     | 3,3',4,4',5,5'-Hexachlorobiphenyl    | 2000                  |
| 189     | 2,3,3',4,4',5,5'-Heptachlorobiphenyl | 2000                  |

Table S5: Summary of HRGC/HRMS and pSFC-MS/MS quantification results for PE1102-2ML – a proficiency testing material for polychlorinated dioxins and furans in water by U.S. EPA Method 8280B.

| Compound      | IS % recovery | HRGC/HRMS ng/L | actual ng/L | % Difference | pSFC-MS/MS ng/L | actual ng/L | % Difference |
|---------------|---------------|----------------|-------------|--------------|-----------------|-------------|--------------|
| 2378-TCDF     | 92            | 119            | 124         | 4.0          | 97              | 124         | 22.0         |
| 12378-PeCDF   | 84            | --             | 0           | --           | --              | 0           | --           |
| 23478-PeCDF   | 83            | --             | 0           | --           | --              | 0           | --           |
| 123478-HxCDF  | 87            | --             | 0           | --           | --              | 0           | --           |
| 123678-HxCDF  | 86            | --             | 0           | --           | --              | 0           | --           |
| 234678-HxCDF  | 86            | --             | 0           | --           | --              | 0           | --           |
| 123789-HxCDF  | 85            | --             | 0           | --           | --              | 0           | --           |
| 1234678-HpCDF | 83            | --             | 0.34        | --           | --              | 0.34        | --           |
| 1234789-HpCDF | 84            | --             | 0.09        | --           | --              | 0.09        | --           |
| OCDF          | --            | 69             | 65          | 6.2          | 53              | 65          | 18.3         |
| 2378-TCDD     | 86            | 114            | 96          | 18.8         | 72              | 96          | 25.0         |
| 12378-PeCDD   | 91            | 51.3           | 46.3        | 10.8         | 41              | 46.3        | 11.1         |
| 123478-HxCDD  | 89            | 132            | 108         | 22.2         | 84              | 108         | 21.9         |
| 123678-HxCDD  | 94            | 81             | 76.8        | 5.5          | 55              | 76.8        | 27.8         |
| 123789-HxCDD  | --            | 45.6           | 40.9        | 11.5         | 38              | 40.9        | 6.1          |
| 1234678-HpCDD | 90            | 96.4           | 90.9        | 6.1          | 58              | 90.9        | 35.7         |
| OCDD          | 78            | 18.7           | 18          | 3.9          | 14              | 18          | 21.2         |
